# Supplementary material
Source: ML conference proceedings conference paper supplement (https://openreview.net/forum?id=VM7u8ecLrZV)
Supplement: supplementary_material [file attachment]

## A Lower bounds

In this section, we show the following lower bound:

**Theorem A.1.** *Any algorithm for Euclidean  $(k, \ell)$ -clustering with a finite approximation ratio has average sensitivity  $\Omega(k/n)$ .*

We note that, for algorithms that select  $k$  centroids only from the input  $X$  (and not from  $\mathbb{R}^d \setminus X$ ), there is a trivial lower bound of  $\Omega(k/n)$  because when one of the centroids is deleted, which happens with probability  $\Omega(k/n)$ , the algorithm must change its output. Theorem A.1 shows that the same lower bound applies even for algorithms that may select centroids from  $\mathbb{R}^d \setminus X$ .

*Proof of Theorem A.1.* Let  $A$  be an algorithm with a finite approximation ratio. Let  $X = \{x_1, \dots, x_n\}$  be a set of points in  $\mathbb{R}^n$  such that  $x_1, \dots, x_{k+1}$  are all distinct and  $x_{k+1} = x_{k+2} = \dots = x_n$ . Then for any  $X^{(i)}$  with  $1 \leq i \leq k$ , the set  $Z_i := \{x_1, \dots, x_{i-1}, x_{i+1}, \dots, x_{k+1}\}$  is the unique optimal solution, which gives the objective value zero. Hence to have a finite approximation ratio, the algorithm  $A$  must output  $Z_i$  on  $X^{(i)}$ . Let  $p_i$  be the probability that the algorithm  $A$  outputs  $Z_i$  on  $X$ . Then, the average sensitivity of  $A$  on  $X$  is

$$\begin{aligned} \frac{1}{n} \sum_{i=1}^n d_{\text{TV}}(A(X), A(X^{(i)})) &\geq \frac{1}{n} \sum_{i=1}^k d_{\text{TV}}(A(X), A(X^{(i)})) \geq \frac{1}{n} \sum_{i=1}^k (1 - p_i) \\ &\geq \frac{1}{n} (k - 1) = \Omega\left(\frac{k}{n}\right). \end{aligned} \quad \square$$

## B Proof of Lemma 3.5

The following useful lemma is implicit in the proof of Lemma 2.3 of [15].

**Lemma B.1.** *For  $\epsilon, B, B' > 0$ , let  $X$  and  $X'$  be sampled from the uniform distributions over  $[B, (1 + \epsilon)B]$  and  $[B', (1 + \epsilon)B']$ , respectively. Then, we have*

$$d_{\text{TV}}(X, X') \leq \frac{1 + \epsilon}{\epsilon} \left| 1 - \frac{B'}{B} \right|.$$

*Proof of Lemma 3.5.* We now analyze the size of the coreset. As we mentioned, the approximation ratio of  $D^\ell$ -SAMPLING is  $O(2^\ell \log k)$ . Also, we have  $\mathbf{E} \sum_{x \in X} s_{X, Z}(x) \leq 2^{2\ell+3} O(\log^2 k) k = O(2^{2\ell} k \log^2 k)$  by Lemma 3.4. Hence by the choice of  $m_Z$ , the size of  $C$  is at most

$$O\left(\frac{2^{2\ell} k \log^2 k}{\epsilon^2} \left( dk(\log(2^{2\ell} k \log^2 k)) + \log \frac{1}{\delta} \right)\right) = \tilde{O}\left(\frac{2^{2\ell} k}{\epsilon^2} \left( dk\ell + \log \frac{1}{\delta} \right)\right) \quad (5)$$

Next, we analyze the average sensitivity. Let  $X = \{x_1, \dots, x_n\}$ . Let  $Z$  and  $Z^{(i)}$  be the outputs of  $D^\ell$ -SAMPLING on  $X$  and  $X^{(i)}$ , respectively. Then by Theorem 2.1, we have  $(1/n) \sum_{i=1}^n d_{\text{TV}}(Z, Z^{(i)}) = O(k/n)$ . Let  $(C, w)$  and  $(C^{(i)}, w^{(i)})$  be the coresets constructed for  $X$  and  $X^{(i)}$ , respectively. We have

$$\begin{aligned} &\frac{1}{n} \sum_{i=1}^n d_{\text{TV}}((C, w), (C^{(i)}, w^{(i)})) \\ &= \frac{1}{n} \sum_{i=1}^n d_{\text{TV}}(Z, Z^{(i)}) + \frac{1}{n} \sum_{i=1}^n \int d_{\text{TV}}(\{(C, w) \mid Z = \tilde{Z}\}, \{(C^{(i)}, w^{(i)}) \mid Z^{(i)} = \tilde{Z}\}) d\tilde{Z} \\ &= O\left(\frac{k}{n}\right) + \frac{1}{n} \sum_{i=1}^n \int d_{\text{TV}}(\{C \mid Z = \tilde{Z}\}, \{C^{(i)} \mid Z = \tilde{Z}\}) d\tilde{Z} \\ &\quad + \frac{1}{n} \int \int \sum_{i=1}^n d_{\text{TV}}(\{w \mid C = \tilde{C}, Z = \tilde{Z}\}, \{w^{(i)} \mid C^{(i)} = \tilde{C}, Z^{(i)} = \tilde{Z}\}) d\tilde{C} d\tilde{Z}. \end{aligned} \quad (6)$$

Now, we bound the second term. Let  $p(x)$  and  $p^{(i)}(x)$  denote the probability of sampling  $x$  from  $X$  and  $X^{(i)}$ , respectively, in (one iteration of) CORESET. Conditioned on that  $Z = Z^{(i)} = \tilde{Z}$ , we have

$$\begin{aligned} & \sum_{i=1}^n \sum_{x \in X^{(i)}} |p(x) - p^{(i)}(x)| = \sum_{i=1}^n \sum_{x \in X^{(i)}} \left| \frac{s_{X, \tilde{Z}}(x)}{S_{X, \tilde{Z}}} - \frac{s_{X^{(i)}, \tilde{Z}}(x)}{S_{X^{(i)}, \tilde{Z}}} \right| \\ &= \sum_{i=1}^n \sum_{x \in X^{(i)}} \frac{s_{X, \tilde{Z}}(x)(S_{X, \tilde{Z}} - S_{X^{(i)}, \tilde{Z}})}{S_{X, \tilde{Z}} S_{X^{(i)}, \tilde{Z}}} = \sum_{i=1}^n \sum_{x \in X^{(i)}} \frac{s_{X, \tilde{Z}}(x) \cdot s_{X, \tilde{Z}}(x_i)}{S_{X, \tilde{Z}} S_{X^{(i)}, \tilde{Z}}} = \sum_{i=1}^n \frac{s_{X, \tilde{Z}}(x_i)}{S_{X, \tilde{Z}}} = 1. \end{aligned} \quad (7)$$

Then, we have

$$\frac{1}{n} \sum_{i=1}^n d_{\text{TV}}(\{C \mid Z = \tilde{Z}\}, \{C^{(i)} \mid Z = \tilde{Z}\}) = \frac{m\tilde{Z}}{n} \sum_{i=1}^n \left( p(x_i) + \sum_{x \in X^{(i)}} |p(x) - p^{(i)}(x)| \right) = O\left(\frac{m\tilde{Z}}{n}\right).$$

Hence, the second term of (6) is  $O(\mathbf{E}m_Z/n)$ .

Now we bound the third term of (6). By Lemma B.1, it can be bounded by

$$\begin{aligned} & \frac{\mathbf{E}m_Z}{n} \sum_{i=1}^n \left( \sum_{x \in X^{(i)}} \min\{p(x), p^{(i)}(x)\} \cdot \frac{1+\epsilon}{\epsilon} \left| 1 - \frac{p^{(i)}(x)}{p(x)} \right| \right) \\ & \leq \frac{\mathbf{E}m_Z}{n} \sum_{i=1}^n \left( \sum_{x \in X^{(i)}} \frac{1+\epsilon}{\epsilon} |p(x) - p^{(i)}(x)| \right) = O\left(\frac{\mathbf{E}m_Z}{\epsilon n}\right), \end{aligned}$$

where the last equality is by (7). By combining above, the average sensitivity of the algorithm is given as

$$O\left(\frac{k}{n}\right) + O\left(\frac{\mathbf{E}m_Z}{n}\right) + O\left(\frac{\mathbf{E}m_Z}{\epsilon n}\right) = O\left(\frac{m}{\epsilon n}\right).$$

By combining the above and (5), the claim follows.  $\square$

## C Consistent transformation

In this section, we show that the general transformation discussed in Section 3 can be used to design consistent algorithms in the random-order model. To this end, we first prove the following.

**Lemma C.1.** *Let  $A$  be the algorithm of Lemma 3.5. Then, the probability transportation for  $A$  with average sensitivity as in Lemma 3.5 is computable.*

*Proof.* Let us fix a set  $X$  of  $n$  points in  $\mathbb{R}^d$  and  $i \in [n]$ . Then, given a coresets  $(C^{(i)}, w^{(i)})$  for  $X^{(i)}$ , we need to compute a coresets  $(C, w)$  for  $X$ . We apply the probability transportation used in the proof of Theorem 4.3 to compute a set  $Z$  of  $k$  points for  $X$  from a set  $Z^{(i)}$  of  $k$  points for  $X^{(i)}$ . If  $Z \neq Z^{(i)}$ , then we compute the coresets  $(C, w)$  by running CORESET. If  $Z = Z^{(i)}$ , then we recompute points (and weights) added to  $C$  by applying LAZYSAMPLING on each point in  $C^{(i)}$ . This provides a probability transportation, and we can observe that all the conditions of Definition 4.1 are satisfied.  $\square$

**Theorem C.2.** *Let  $A$  be an  $\alpha$ -approximation algorithm for Euclidean  $(k, \ell)$ -clustering. Then for any  $\epsilon, \delta > 0$ , there exists an algorithm for consistent Euclidean  $(k, \ell)$ -clustering in the random-order model such that (i) it outputs  $(1 + \epsilon)\alpha$ -approximation with probability at least  $1 - \delta$  at each step, and (ii) its inconsistency is*

$$\tilde{O}\left(\frac{2^{2\ell} k^2 \log n}{\epsilon^3} \left(dk\ell + \log \frac{1}{\delta}\right)\right).$$

*Proof.* We combine Lemma 4.2 and Lemma C.1. The approximation guarantee is clearly satisfied. The inconsistency of the algorithm is  $k \cdot \sum_{t=1}^n O(\mathbf{E}|C|/\epsilon t) = k \log n \cdot O(\mathbf{E}|C|/\epsilon)$ , and hence the claim holds.  $\square$

## D Dynamic transformation

We show that the consistent transformation discussed in Section C can be implemented in such a way that the amortized update time in the random-order model is small. Specifically, we show the following:

**Theorem D.1.** *Let  $A$  be an  $\alpha$ -approximation algorithm for Euclidean  $(k, \ell)$ -clustering with time complexity  $T(n, d, k, \ell)$ . Then for any  $\epsilon, \delta > 0$ , there exists an algorithm for dynamic Euclidean  $(k, \ell)$ -clustering in the random-order model that (i) outputs  $(1 + \epsilon)\alpha$ -approximation with probability at least  $1 - \delta$ , and (ii) its amortized update time is*

$$O\left(dk + \left(k(k + \log n) + \frac{mT(m, d, k, \ell)}{\epsilon}\right) \log n\right),$$

where  $m = \tilde{O}\left(\frac{2^{2\ell}k}{\epsilon^2} (dk\ell + \log \frac{1}{\delta})\right)$ .

*Proof.* The consistent transformation has two components, that is,  $D^\ell$ -SAMPLING and coresets construction.

We use the dynamic algorithm of Theorem 5.1 to run the  $D^\ell$ -SAMPLING part and hence the amortized update time of this part is  $O(dk + (k + \log n)k \log n)$ .

For the coresets construction part, we maintain a coresets  $(C, w)$  and a sequence  $S$  storing  $s(x_1), \dots, s(x_t)$ , where  $s(x)$  is the upper bound on the sensitivity of  $x$  as in the proof of Lemma 3.5. We maintain a binary tree on  $S$  as with dynamic version of  $D^\ell$ -SAMPLING. When the output of  $D^\ell$ -SAMPLING changes after  $x_t$  arrives, we recompute  $(C, w)$  and the sequence  $S$  from scratch. When the output of  $D^\ell$ -SAMPLING does not change, we append  $s(x_t)$  to  $S$ , and then update the coresets  $(C, w)$  using LAZYSAMPLING.

Now we analyze the amortized update time of the coresets construction part. At each step we need  $O(|C| \log n)$  time to update  $(C, w)$ . Also, when the output of  $D^\ell$ -sampling changes, we need additional  $O(t \log t)$  time to reconstruct a binary tree over  $S$ . Finally, when  $(C, w)$  is updated, we need to recompute an optimal solution for  $C$ , which takes  $T(|C|, d, k, \ell)$  time. Recalling that  $|C| \leq m$  by Lemma 3.5, in expectation, the total computational time is bounded as

$$\begin{aligned} & \mathbf{E} \left[ O(|C| \log n) \cdot n + \sum_{t=1}^n O\left(\frac{k}{t}\right) O(t \log t) + \sum_{t=1}^n O\left(\frac{|C|}{\epsilon t}\right) \cdot T(|C|, d, k, \ell) \right] \\ &= O\left(\left(m + k + \frac{mT(m, d, k, \ell)}{\epsilon}\right) \cdot n \log n\right) \\ &= O\left(\left(k + \frac{mT(m, d, k, \ell)}{\epsilon}\right) n \log n\right). \end{aligned}$$

Combined with the amortized time of dynamic  $D^\ell$ -SAMPLING, the claim holds.  $\square$
